# Supplementary material
Source: Springer Nature journal article supplement (https://www.springermedizin.de/resource/supplementary/12891_2008_539_MOESM2_ESM.pdf/9511272)

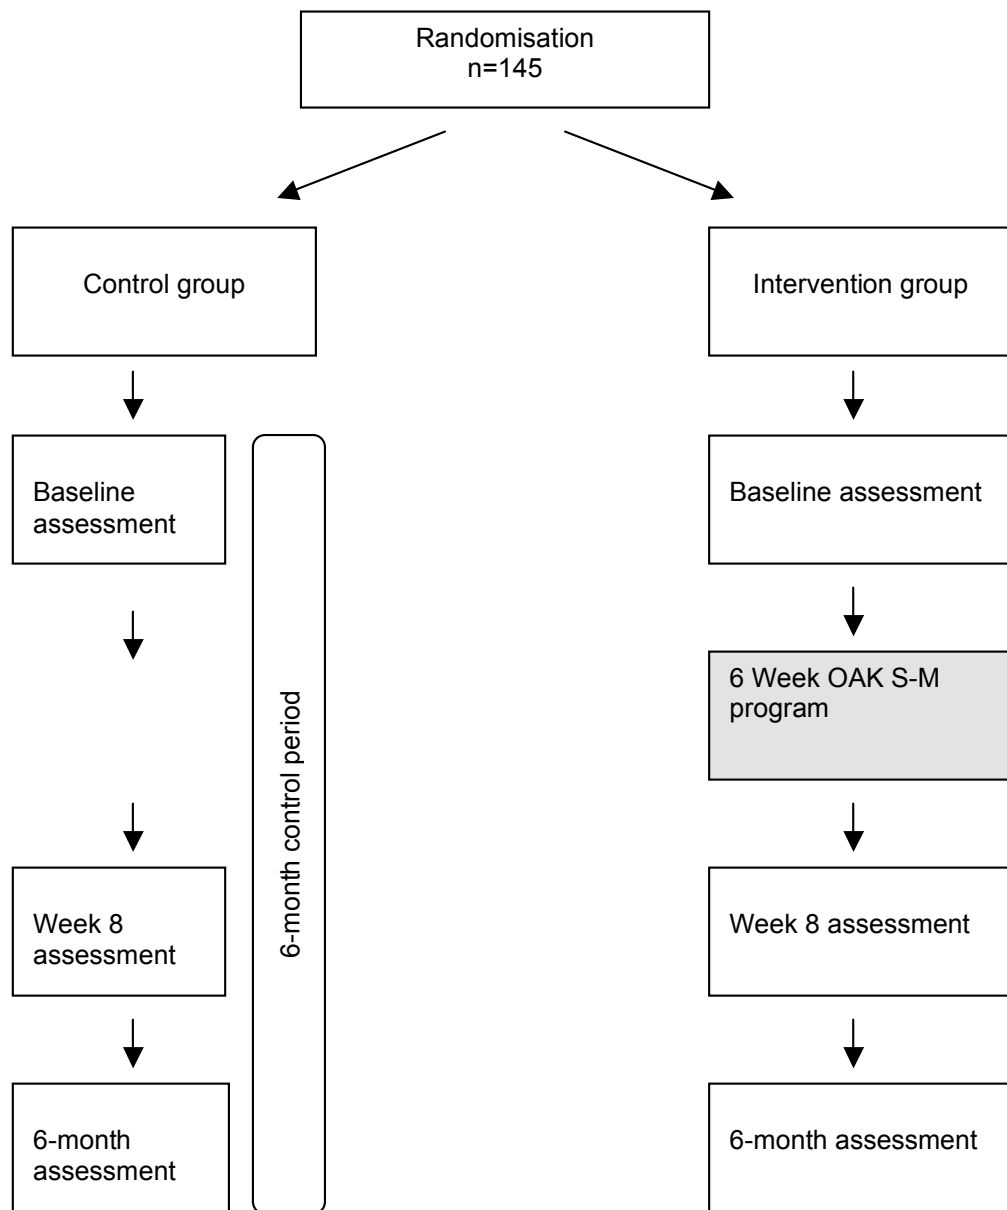

Figure 1: Study Design Flow Chart

Supplement: MOESM2 [file 9511272]
